# Supplementary material for: Seed Priming with Spermine Mitigates Chromium Stress in Rice by Modifying the Ion Homeostasis, Cellular Ultrastructure and Phytohormones Balance
Source: MDPI journal article supplement (doi:10.3390/antiox11091704), 2022-08-30
Supplement: s1 [file s1]

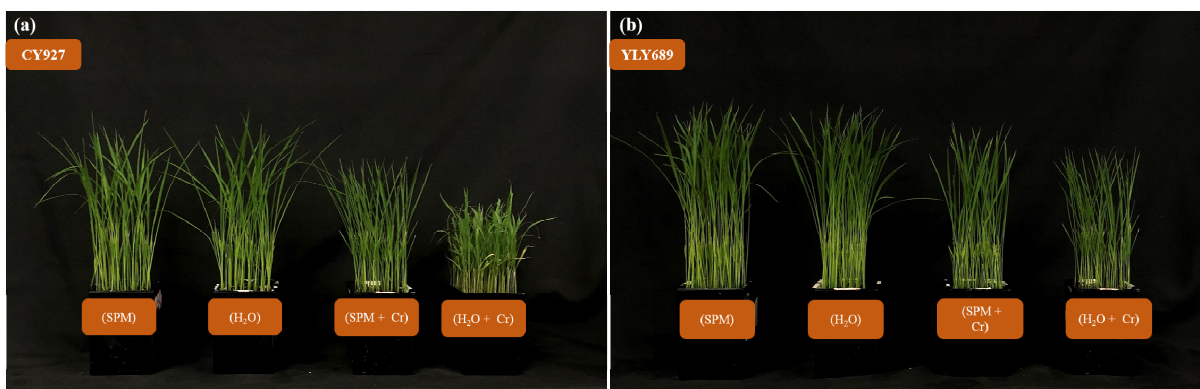

Figure S1. Effect of seed primed with SPM on phenotypic changes of two different rice cultivars under Cr toxicity. (a) Cr-induced phenotypical changes on the CY927 cultivar and mitigation effect of SPM under Cr stress. (b) Cr-induced phenotypical changes on the YLY689 cultivar and mitigation effect of SPM under Cr exposure.

Table S1. Primers information

| Sr. # | Primer name | Accession No. | sequence             |
|-------|-------------|---------------|----------------------|
| 1     | PR1-F       | AU163470      | ATGCTTCGTGCCTCCACTAC |
| 2     | PR1-R       |               | GGCGAGTAGTTGCAGGTGAT |
| 3     | PR2-F       | AY323485      | ATTGAAGCAGGGAGTCGCAT |
| 4     | PR2-R       |               | CGTGTGCTTGGTGCTGTATG |
| 5     | NPR1-F      | DQ450947      | AGCCCTTGACTCTGACGATG |
| 6     | NPR1-R      |               | CAATGTTCGACGGCGTAGTG |

Table S2. Effects of seed priming with Spm on net photosynthetic rate (Pn), transpiration rate (Tr), stomatal conductance (gs), intercellular concentration of CO<sub>2</sub> (Ci), and photochemical efficiency of PS II (Fv/Fm) under chromium (Cr) stress

| Genotypes | Treatments | Pn                      | Tr                     | Gs                     | Ci                        | Fv/Fm                  |
|-----------|------------|-------------------------|------------------------|------------------------|---------------------------|------------------------|
| CY927     | CK         | 7.43±0.06 <sup>b</sup>  | 4.25±0.13 <sup>b</sup> | 0.25±0.00 <sup>a</sup> | 466.44±1.86 <sup>c</sup>  | 0.62±0.02 <sup>a</sup> |
|           | Spm        | 7.49±0.05 <sup>b</sup>  | 4.33±0.03 <sup>b</sup> | 0.25±0.00 <sup>a</sup> | 472.88±3.85 <sup>bc</sup> | 0.63±0.02 <sup>a</sup> |
|           | Cr         | 3.19±0.02 <sup>f</sup>  | 2.26±0.03 <sup>f</sup> | 0.17±0.00 <sup>d</sup> | 236.27±1.37 <sup>g</sup>  | 0.23±0.02 <sup>e</sup> |
|           | Spm+Cr     | 5.43±0.05 <sup>d</sup>  | 2.81±0.05 <sup>d</sup> | 0.19±0.00 <sup>c</sup> | 274.99±4.44 <sup>e</sup>  | 0.35±0.01 <sup>c</sup> |
| YLY689    | CK         | 7.90±0.01 <sup>a</sup>  | 4.64±0.01 <sup>a</sup> | 0.25±0.00 <sup>a</sup> | 479.09±3.96 <sup>a</sup>  | 0.63±0.02 <sup>a</sup> |
|           | Spm        | 7.94±0.06 <sup>a</sup>  | 4.68±0.03 <sup>a</sup> | 0.26±0.00 <sup>a</sup> | 483.82±0.23 <sup>a</sup>  | 0.65±0.02 <sup>a</sup> |
|           | Cr         | 4.30±0.08 <sup>e</sup>  | 2.64±0.01 <sup>e</sup> | 0.19±0.00 <sup>c</sup> | 267.77±1.44 <sup>f</sup>  | 0.31±0.01 <sup>d</sup> |
|           | Spm+Cr     | 6.03b±0.07 <sup>c</sup> | 3.57±0.02 <sup>c</sup> | 0.21±0.00 <sup>b</sup> | 316.35±3.17 <sup>d</sup>  | 0.41±0.02 <sup>b</sup> |

The same letters within a column designate there was no significant difference at a 95% probability level at the  $p < 0.05$  level, correspondingly.

Table S3. Effects of seed priming with Spm on Cr, micro as well as macronutrients uptake in shoots of both rice cultivars (CY927, YLY689) under chromium (Cr) stress

| Genotypes | Treatments | Na <sup>+</sup>         | Mg <sup>2+</sup>       | P                       | K <sup>+</sup>          | Ca <sup>2+</sup>       | Mn <sup>2+</sup>       | Fe <sup>2+</sup>        | Cu <sup>2+</sup>        | Zn <sup>2+</sup>        | Cr <sup>6+</sup>       |
|-----------|------------|-------------------------|------------------------|-------------------------|-------------------------|------------------------|------------------------|-------------------------|-------------------------|-------------------------|------------------------|
|           |            | mg/g                    | mg/g                   | mg/g                    | mg/g                    | mg/g                   | mg/g                   | mg/g                    | mg/g                    | mg/g                    | mg/g                   |
|           |            | Shoots                  |                        |                         |                         |                        |                        |                         |                         |                         |                        |
| CY-927    | CK         | 2.82±0.12 <sup>cd</sup> | 3.57±0.30 <sup>b</sup> | 10.23±0.24 <sup>b</sup> | 34.05±2.11 <sup>b</sup> | 3.76±0.22 <sup>b</sup> | 1.49±0.06 <sup>b</sup> | 0.21±0.09 <sup>b</sup>  | 0.03±0.01 <sup>b</sup>  | 0.09±0.03 <sup>c</sup>  | -                      |
|           | SPM        | 2.90±0.20 <sup>c</sup>  | 3.64±0.28 <sup>b</sup> | 10.55±0.07 <sup>b</sup> | 35.92±2.21 <sup>b</sup> | 3.83±0.23 <sup>b</sup> | 1.54±0.05 <sup>b</sup> | 0.21±0.05 <sup>b</sup>  | 0.03±0.01 <sup>b</sup>  | 0.09±0.01 <sup>c</sup>  | -                      |
|           | Cr         | 2.69±0.02 <sup>d</sup>  | 2.18±0.13 <sup>c</sup> | 6.83±0.127 <sup>f</sup> | 22.85±1.67 <sup>c</sup> | 2.25±0.17 <sup>f</sup> | 0.31±0.05 <sup>f</sup> | 0.05±0.04 <sup>f</sup>  | 0.01±0.00 <sup>d</sup>  | 0.05±0.01 <sup>c</sup>  | 1.93±0.04 <sup>a</sup> |
|           | SPM+Cr     | 1.59±0.05 <sup>f</sup>  | 2.92±0.06 <sup>c</sup> | 8.65±0.13 <sup>d</sup>  | 28.02±1.09 <sup>d</sup> | 2.96±0.14 <sup>d</sup> | 0.90±0.08 <sup>d</sup> | 0.15±0.01 <sup>c</sup>  | 0.02±0.01 <sup>c</sup>  | 0.07±0.03 <sup>d</sup>  | 1.42±0.03 <sup>c</sup> |
| YLY689    | CK         | 3.95±0.10 <sup>a</sup>  | 4.92±0.42 <sup>a</sup> | 14.50±0.27 <sup>a</sup> | 39.80±3.68 <sup>a</sup> | 4.53±0.11 <sup>a</sup> | 2.57±0.10 <sup>a</sup> | 0.38±0.01 <sup>a</sup>  | 0.04±0.00 <sup>a</sup>  | 0.26±0.02 <sup>a</sup>  | -                      |
|           | SPM        | 4.01±0.34 <sup>a</sup>  | 5.17±0.23 <sup>a</sup> | 15.68±0.65 <sup>a</sup> | 41.67±1.53 <sup>a</sup> | 4.61±0.07 <sup>a</sup> | 2.66±0.06 <sup>a</sup> | 0.42±0.04 <sup>a</sup>  | 0.04±0.00 <sup>a</sup>  | 0.27±0.01 <sup>a</sup>  | -                      |
|           | Cr         | 3.05±0.11 <sup>bc</sup> | 2.49±0.51 <sup>d</sup> | 7.56±0.55 <sup>c</sup>  | 28.22±2.53 <sup>d</sup> | 2.50±0.12 <sup>c</sup> | 0.53±0.11 <sup>c</sup> | 0.17±0.02 <sup>dc</sup> | 0.02c±0.00 <sup>c</sup> | 0.09c±0.01 <sup>c</sup> | 1.73±0.03 <sup>b</sup> |
|           | SPM+Cr     | 1.68±0.04 <sup>c</sup>  | 3.61±0.05 <sup>b</sup> | 9.75±0.31 <sup>c</sup>  | 32.97±1.15 <sup>c</sup> | 3.75±0.16 <sup>c</sup> | 1.24±0.18 <sup>c</sup> | 0.25±0.03 <sup>c</sup>  | 0.03±0.00 <sup>b</sup>  | 0.20b±0.02 <sup>b</sup> | 1.46±0.03 <sup>d</sup> |

The same letters within a column designate there was no significant difference at a 95% probability level at the  $p < 0.05$  level, correspondingly.

Table S4. Effects of seed priming with Spm on Cr, micro as well as macronutrients uptake in roots of both rice cultivars (CY927, YLY689) under chromium (Cr) stress

| Genotypes | Treatments | Na <sup>+</sup>         | Mg <sup>2+</sup>        | P                      | K <sup>+</sup>          | Ca <sup>2+</sup>       | Mn <sup>2+</sup>        | Fe <sup>2+</sup>       | Cu <sup>2+</sup>       | Zn <sup>2+</sup>         | Cr <sup>6+</sup>        |
|-----------|------------|-------------------------|-------------------------|------------------------|-------------------------|------------------------|-------------------------|------------------------|------------------------|--------------------------|-------------------------|
|           |            | mg/g                    | mg/g                    | mg/g                   | mg/g                    | mg/g                   | mg/g                    | mg/g                   | mg/g                   | mg/g                     | mg/g                    |
|           |            | Roots                   |                         |                        |                         |                        |                         |                        |                        |                          |                         |
| CY-927    | CK         | 4.61±0.25 <sup>c</sup>  | 2.24±0.23 <sup>ef</sup> | 5.51±0.23 <sup>c</sup> | 12.50±0.22 <sup>b</sup> | 3.34±0.33 <sup>b</sup> | 0.39±0.02 <sup>a</sup>  | 5.26±0.09 <sup>b</sup> | 0.18±0.01 <sup>b</sup> | 0.10a±0.01 <sup>b</sup>  | -                       |
|           | SPM        | 4.53±0.08 <sup>cd</sup> | 2.17±0.17 <sup>f</sup>  | 5.47±0.15 <sup>c</sup> | 12.58±0.29 <sup>b</sup> | 3.54±0.26 <sup>b</sup> | 0.39±0.05 <sup>a</sup>  | 5.67±1.37 <sup>b</sup> | 0.18±0.01 <sup>b</sup> | 0.11a±0.02 <sup>b</sup>  | -                       |
|           | Cr         | 3.65±0.08 <sup>e</sup>  | 2.88±0.46 <sup>c</sup>  | 4.08±0.32 <sup>f</sup> | 5.48±0.17 <sup>f</sup>  | 1.81±0.08 <sup>f</sup> | 0.07±0.02 <sup>e</sup>  | 2.88±0.26 <sup>f</sup> | 0.09±0.01 <sup>e</sup> | 0.06b±0.01 <sup>e</sup>  | 2.65a±0.39 <sup>b</sup> |
|           | SPM+Cr     | 3.09±0.28 <sup>f</sup>  | 2.59±0.12 <sup>d</sup>  | 4.64±0.21 <sup>e</sup> | 8.89±0.24 <sup>d</sup>  | 2.41±0.31 <sup>d</sup> | 0.21±0.06 <sup>c</sup>  | 3.64±0.13 <sup>d</sup> | 0.14±0.01 <sup>d</sup> | 0.08ab±0.02 <sup>d</sup> | 0.50b±0.09 <sup>c</sup> |
| YLY689    | CK         | 7.97±0.54 <sup>a</sup>  | 2.29±0.13 <sup>c</sup>  | 8.36±0.07 <sup>a</sup> | 15.65±1.49 <sup>a</sup> | 4.39±0.34 <sup>a</sup> | 0.41±0.07 <sup>a</sup>  | 6.88±0.35 <sup>a</sup> | 0.21±0.06 <sup>a</sup> | 0.13a±0.03 <sup>a</sup>  | -                       |
|           | SPM        | 8.24±0.45 <sup>a</sup>  | 2.33±0.99 <sup>e</sup>  | 8.67±0.14 <sup>a</sup> | 15.98±3.11 <sup>a</sup> | 4.57±0.18 <sup>a</sup> | 0.42±0.02 <sup>a</sup>  | 6.63±0.45 <sup>a</sup> | 0.22±0.02 <sup>a</sup> | 0.13a±0.05 <sup>a</sup>  | -                       |
|           | Cr         | 6.21±0.16 <sup>b</sup>  | 4.72±0.07 <sup>a</sup>  | 5.26±0.32 <sup>d</sup> | 6.41±1.54 <sup>c</sup>  | 2.03±0.17 <sup>c</sup> | 0.08±0.01 <sup>dc</sup> | 3.36±0.11 <sup>c</sup> | 0.09±0.04 <sup>c</sup> | 0.06c±0.04 <sup>c</sup>  | 3.31a±0.53 <sup>a</sup> |
|           | SPM+Cr     | 4.46±1.02 <sup>d</sup>  | 4.17±0.24 <sup>b</sup>  | 6.90±0.25 <sup>b</sup> | 9.47±2.07 <sup>cd</sup> | 2.65±0.10 <sup>c</sup> | 0.29±0.03 <sup>b</sup>  | 4.56±0.27 <sup>c</sup> | 0.16±0.03 <sup>c</sup> | 0.09b±0.02 <sup>cd</sup> | 0.33b±0.51 <sup>d</sup> |

The same letters within a column designate there was no significant difference at a 95% probability level at the  $p < 0.05$  level, correspondingly.
